# Supplementary material for: Vibrational and optical identification of GeO2 and GeO single layers: a first-principles study
Source: Royal Society of Chemistry journal article supplement (doi:10.1039/d1cp02299g), 2021-01-01
Supplement: d1cp02299g1.pdf [file d1cp02299g1.pdf]

## Electronic Supplementary Information (ESI)

### Vibrational and Optical Identification of GeO<sub>2</sub> and GeO Single Layers: A First-Principles Study

Y. Sozen,<sup>1</sup> M. Yagmurcukardes,<sup>2,1,3</sup> and H. Sahin<sup>1</sup>

<sup>1</sup>*Department of Photonics, Izmir Institute of Technology, 35430, Izmir, Turkey*

<sup>2</sup>*Department of Physics, University of Antwerp,*

*Groenenborgerlaan 171, B-2020 Antwerp, Belgium*

<sup>3</sup>*NANOLab Center of Excellence, Groenenborgerlaan 171, B-2020 Antwerp, Belgium.*

## I. SUPPLEMENTARY FIGURES

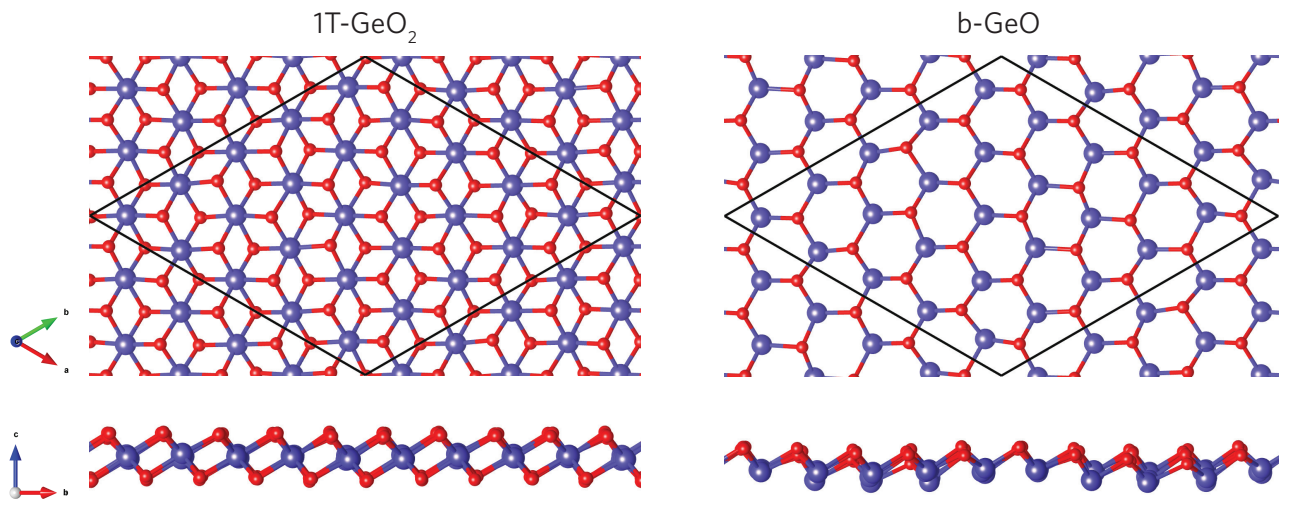

FIG. S1: Top and side view of crystal structures at room temperature from molecular dynamics simulations.
